# Supplementary material for: Leucine 232 and hydrophobic residues at the ribosomal P stalk binding site are critical for biological activity of ricin
Source: Oxford University Press journal article supplement (doi:10.1042/bsr20192022), 2019-09-23
Supplement: bsr-2019-2022_supp.pdf [file bsr-2019-2022_supp.pdf]

## Supplementary Information

### **Leucine 232 and hydrophobic residues at the ribosomal P stalk binding site are critical for biological activity of ricin**

Yijun Zhou, Xiao-Ping Li, Jennifer N. Kahn, John E. Mclaughlin and Nilgun E. Tumer

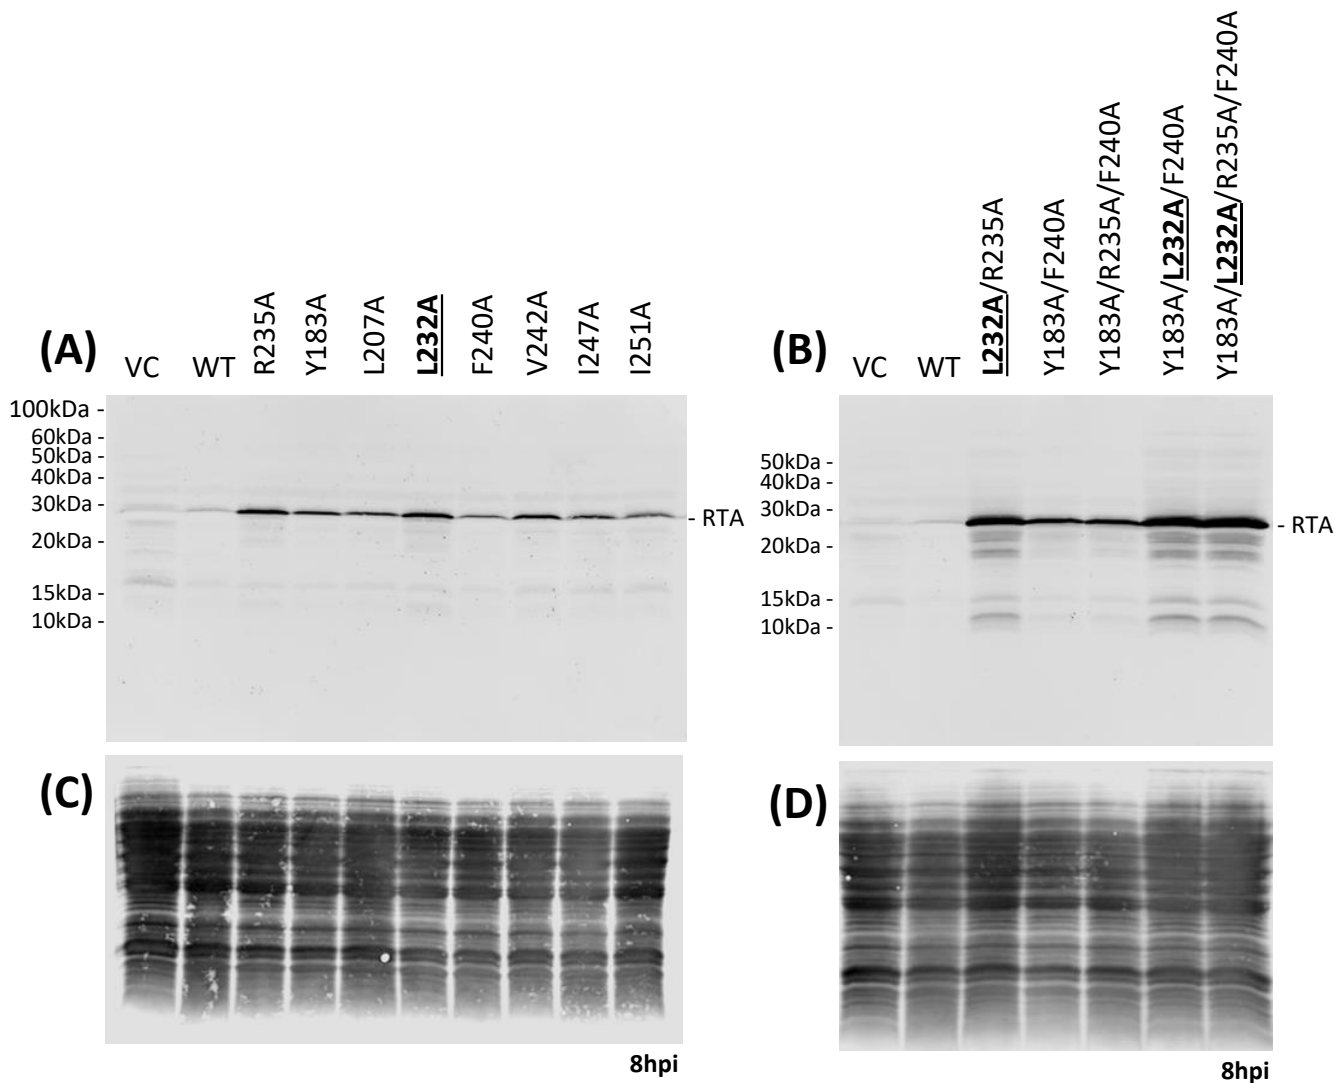

**Figure S1. Expression of hydrophobic mutants in yeast.**

**(A)** The full gel of Fig.1E showing western blot analysis of single RTA mutants in yeast at 8 hpi. **(B)** The full gel of Fig. 2C showing western blot analysis of double, triple and quadruple RTA mutants in yeast at 8 hpi. **(C)** Total protein stain of A. **(D)** Total protein stain of B.

### (A) Yeast depurination at 0 hpi

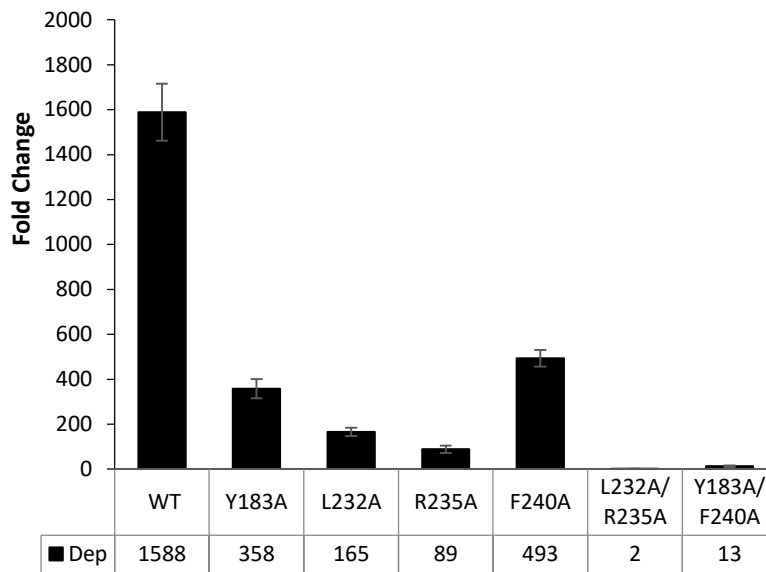

### (B) Yeast depurination at 0 hpi

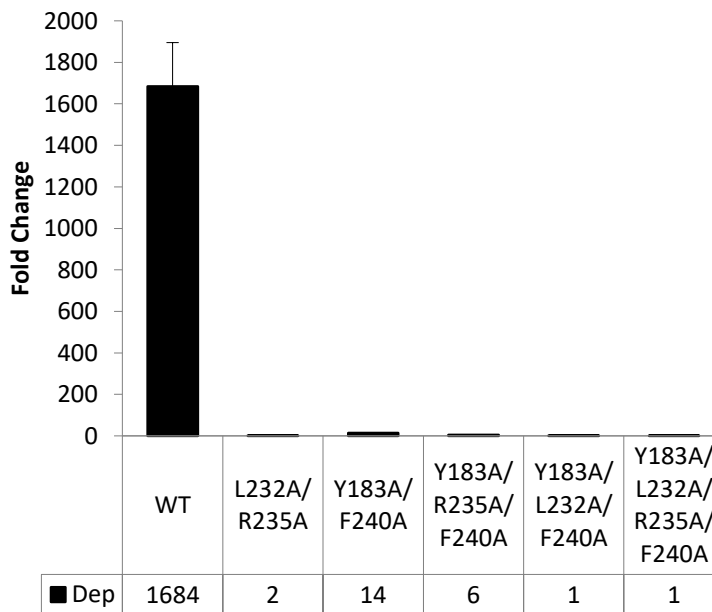

#### Figure S2. Depurination of RTA variants in yeast.

Yeast cells transformed with VC, WT RTA or RTA mutants were cultured overnight in GLU-LEU medium for 20 hours (0 hpi). Depurination was measured by qRT-PCR. **(A)** Depurination of WT RTA, single and double RTA mutants at 0 hpi. **(B)** Depurination of WT RTA, double, triple and quadruple RTA mutants at 0 hpi. Fold change in depurination is shown relative to the VC.

**(A)**

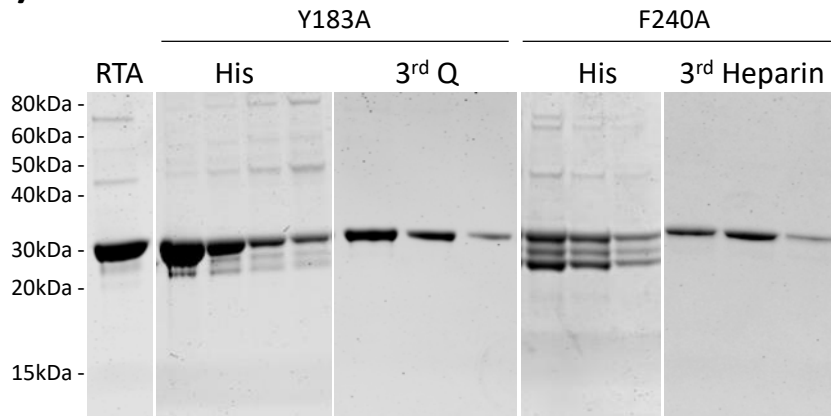

**(B)**

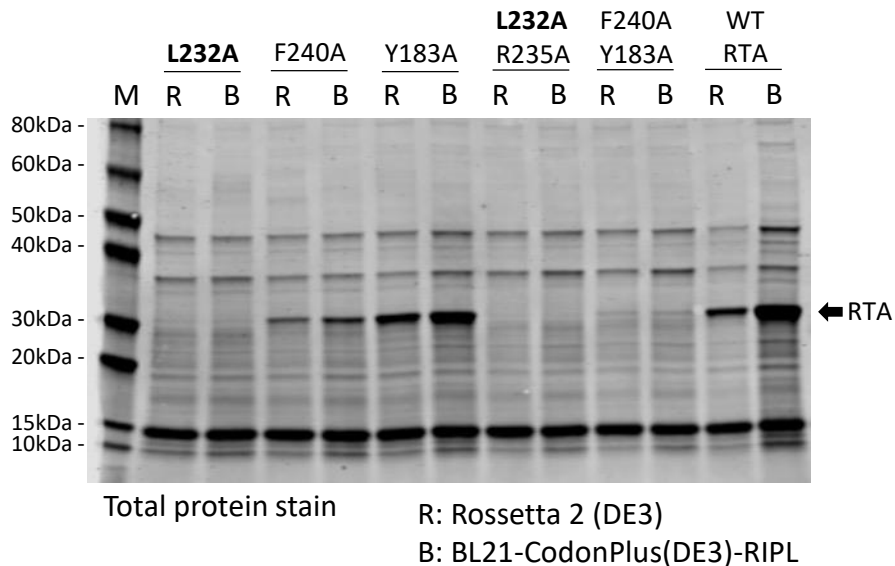

**Figure S3. Purification of hydrophobic mutants.**

**(A)** Eluted fractions from His (2<sup>nd</sup>) and Q (3<sup>rd</sup>) column purification of Y183A and His (2<sup>nd</sup>) and Heparin (3<sup>rd</sup>) column purification of F240A are shown. Purified RTA is loaded as control. **(B)** Hydrophobic mutants were expressed in two different *E.coli* expression strains, Rossetta 2 (DE3) (R) and BL21-CodonPlus(DE3)-RIPL (B), as described in the Materials and Methods. After separation on SDS-PAGE, proteins were transferred to a 0.2  $\mu$ m nitrocellulose membrane and stained with REVERT total protein stain kit (LICOOR, Lincoln, NE, USA). Molecular weight markers are shown (M).

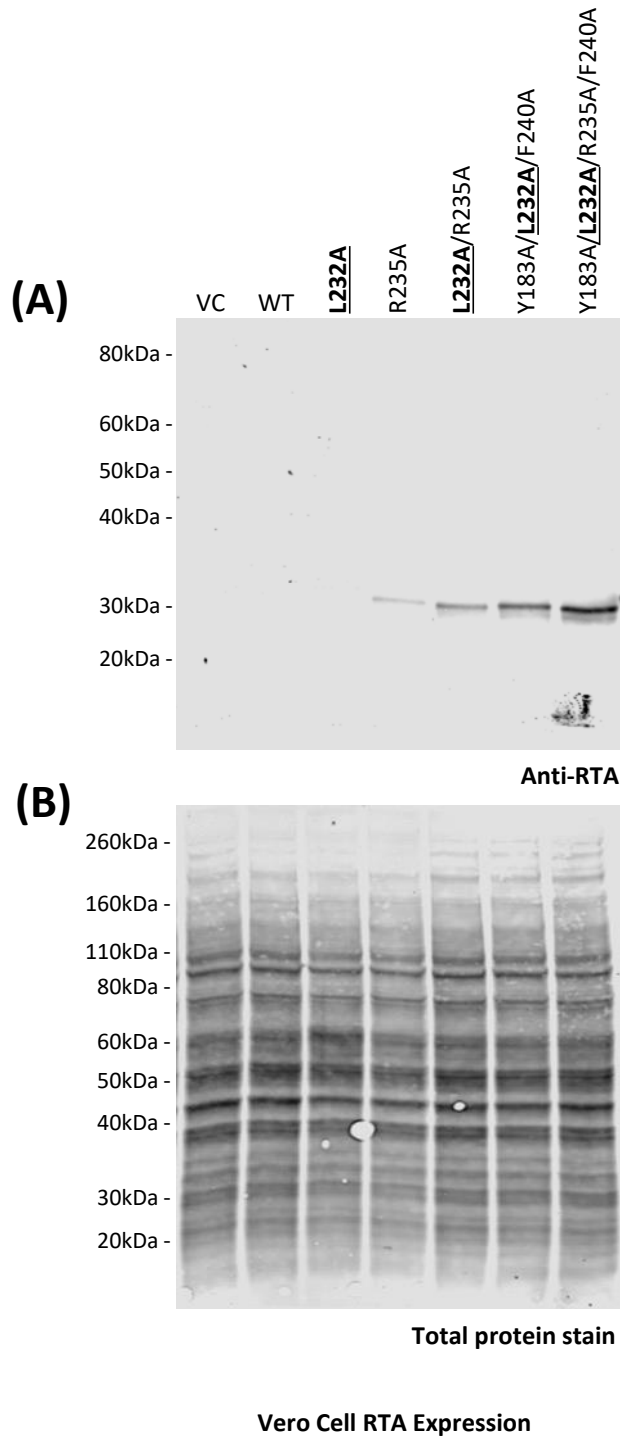

**Figure S4. Expression of RTA mutants in Vero cells.**

**(A)** The full gel of Fig. 5D showing western blot analysis of RTA mutants expressed in Vero cells. **(B)** Total protein stain of A.

**(A)****Sequence Alignment of TCS and RTA**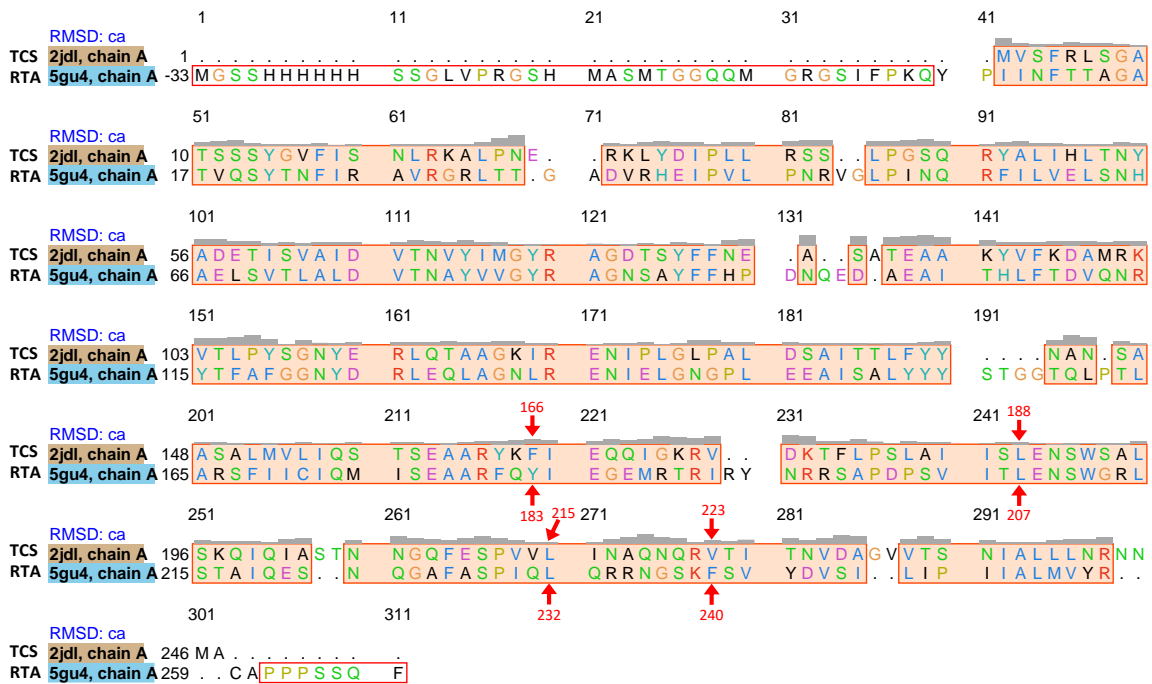**(B)**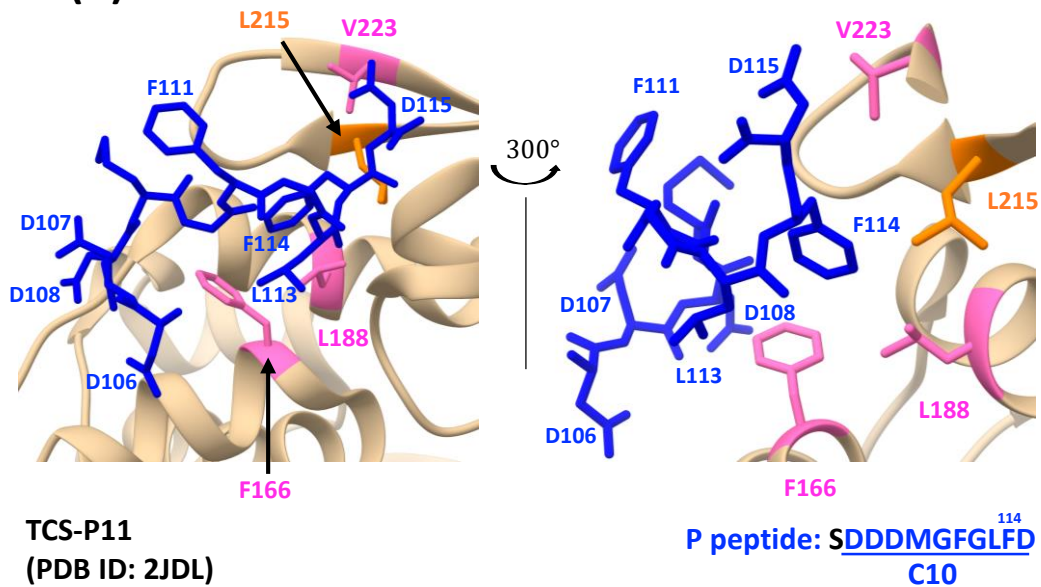**Figure S5. Sequence alignment of TCS with RTA.**

**(A)** TCS (PDB ID: 2JDL) and RTA (PDB ID: 5GU4) were aligned using Chimera. Tyr183, Leu207, Leu232 and Phe240 of RTA and the corresponding residues in TCS, Phe166, Leu188, Leu215 and Val223 respectively, are indicated with arrows and residue numbers.

**(B)** Structure of TCS-P11 (PDB ID:2JDL) visualized using Chimera. TCS is colored in tan, Val223, Leu188, and Phe166 are colored in pink. Leu215 is colored in orange. P11 peptide is colored in blue.
